# Supplementary material for: Ileal Crohn's Disease Exhibits Similar Transmural Fibrosis Irrespective of Phenotype
Source: PubMed Central journal article supplement — Clin Transl Gastroenterol. 2021 Apr 13;12(4):e00330. doi: 10.14309/ctg.0000000000000330 (PMC8049162; doi:10.14309/ctg.0000000000000330), 2021-04-13
Supplement: ct9-12-e00330-s001.pdf [file ct9-12-e00330-s001.pdf]

Figure, Supplemental Digital Content 1. Flowchart of patient selection.

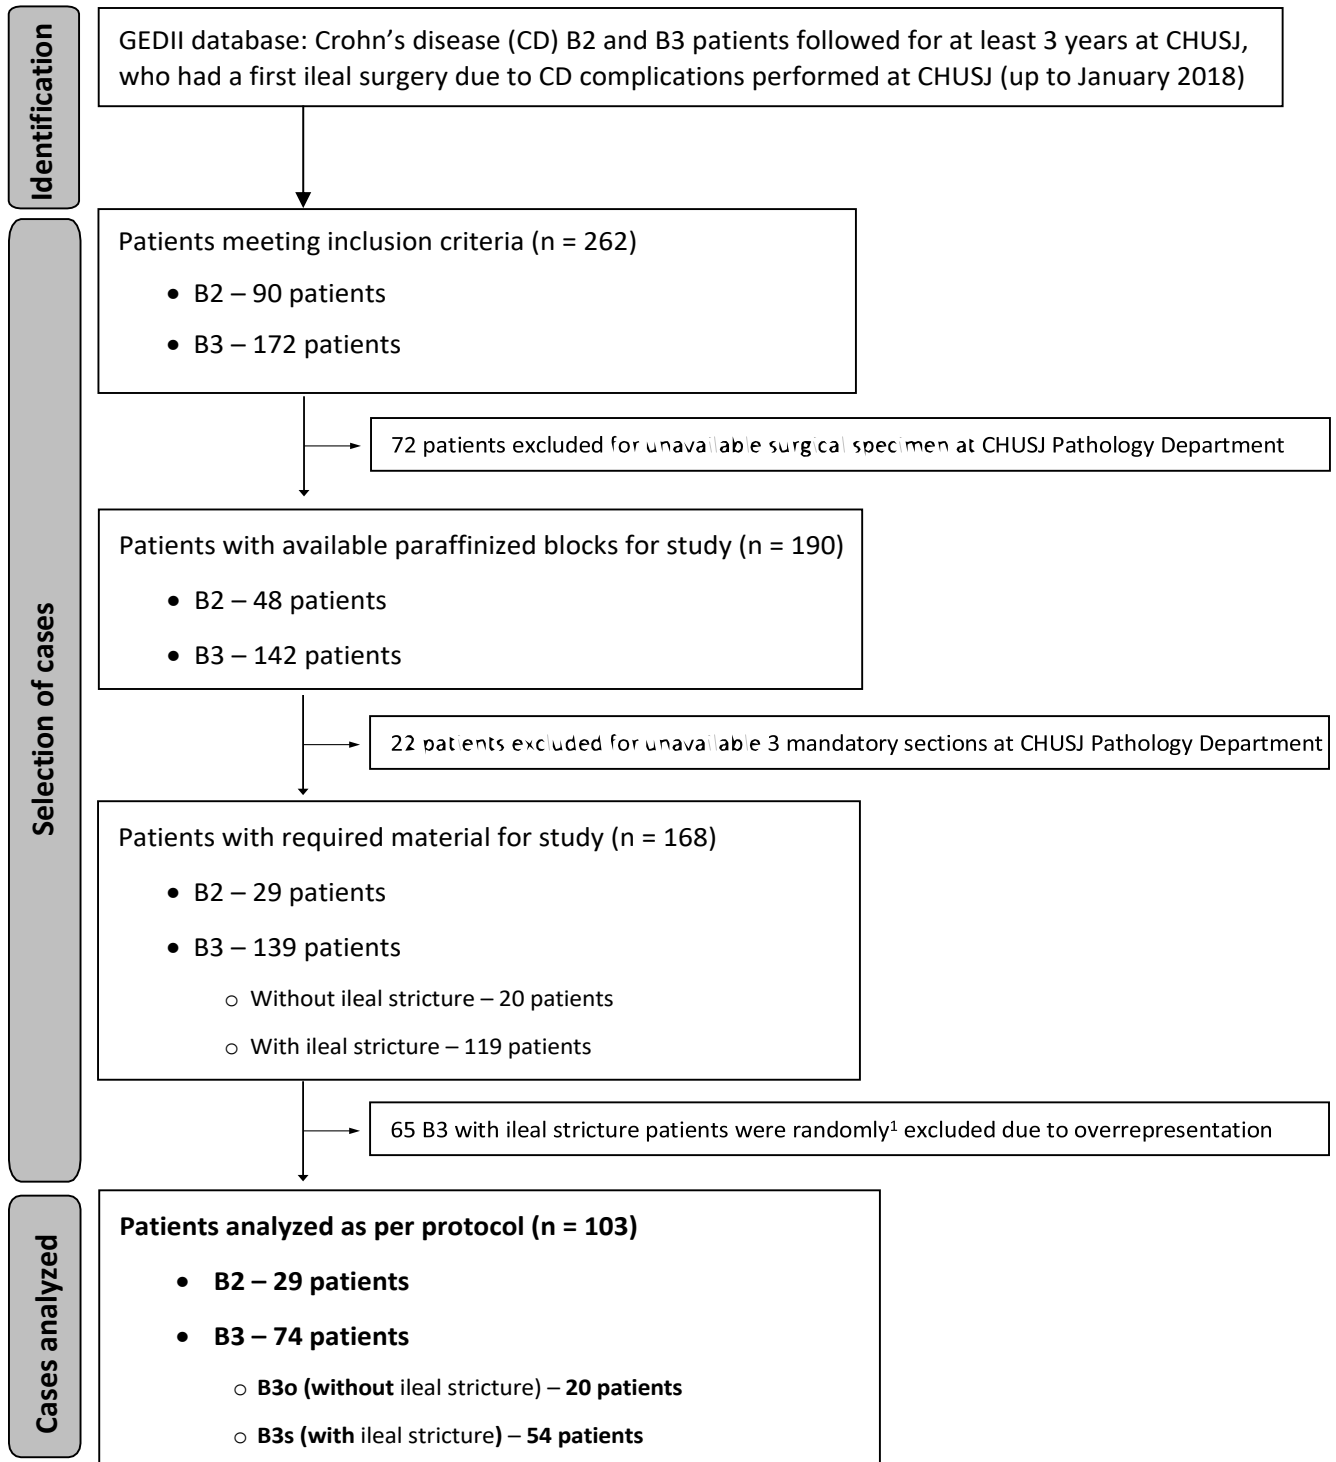

Caption: GEDII: Grupo de Estudo de Doença Inflamatória Intestinal (Portuguese Group for the Study of Inflammatory Bowel Disease); CHUSJ: São João University Hospital Centre; B2: stricturing CD, B3: penetrating CD, B3o: penetrating CD without associated stricture, B3s: penetrating CD with associated stricture; 1 Excel™s random numbers tool (RAND function).
