# Supplementary material for: Ileal Crohn's Disease Exhibits Similar Transmural Fibrosis Irrespective of Phenotype
Source: PubMed Central journal article supplement — Clin Transl Gastroenterol. 2021 Apr 13;12(4):e00330. doi: 10.14309/ctg.0000000000000330 (PMC8049162; doi:10.14309/ctg.0000000000000330), 2021-04-13
Supplement: ct9-12-e00330-s002.pdf [file ct9-12-e00330-s002.pdf]

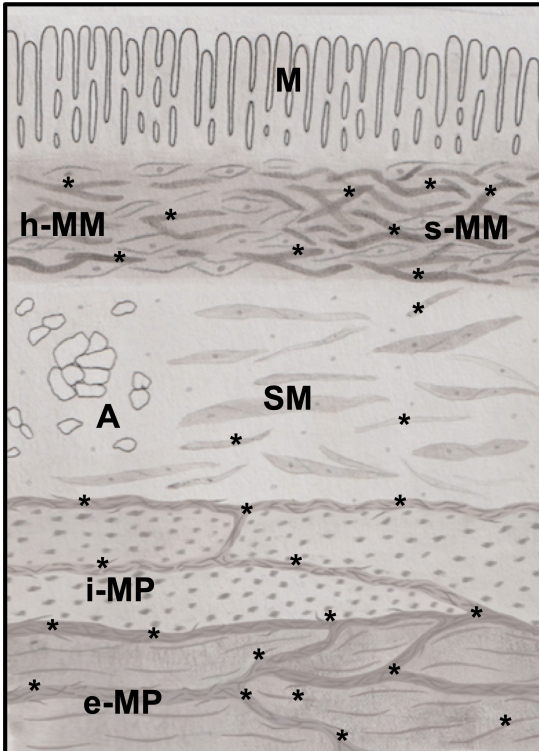

Figure, Supplemental Digital Content 2. Schematic representation of ileal intestinal wall bearing main Crohn's disease fibromuscular changes. Caption: M: mucosa; h-MM: hyperplastic expanded muscularis mucosae; s-MM: fibrosis-splayed expanded muscularis mucosae; SM: expanded submucosa with scattered smooth muscle cells; A: adipose tissue in the submucosa; i-MP: expanded internal muscularis propria; e-MP: expanded external muscularis propria; asterisks: fibrosis stripes.
