# Supplementary material for: Ileal Crohn's Disease Exhibits Similar Transmural Fibrosis Irrespective of Phenotype
Source: PubMed Central journal article supplement — Clin Transl Gastroenterol. 2021 Apr 13;12(4):e00330. doi: 10.14309/ctg.0000000000000330 (PMC8049162; doi:10.14309/ctg.0000000000000330), 2021-04-13

Figure, Supplemental Digital Content 3. Kaplan-Meier curves displaying time from index surgery to each outcome per phenotype. Time from index surgery to each outcome is considered only for patients presenting the outcome.

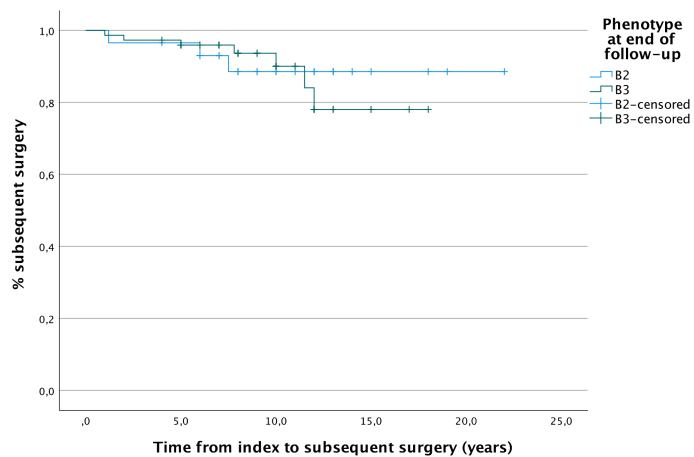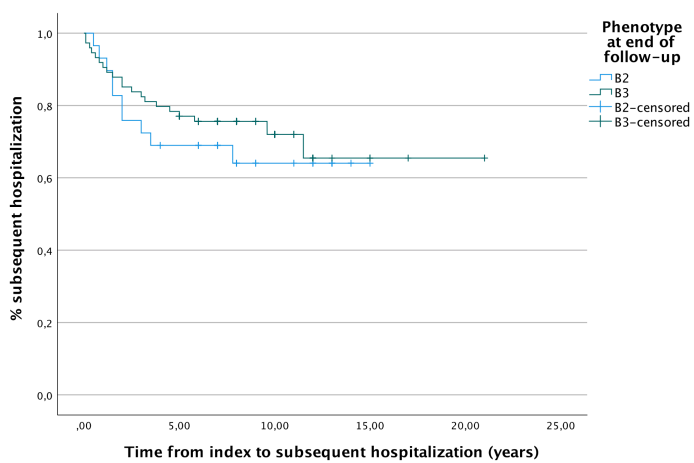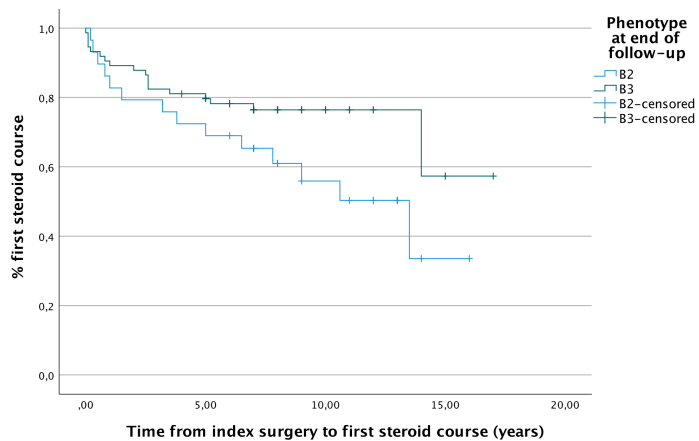

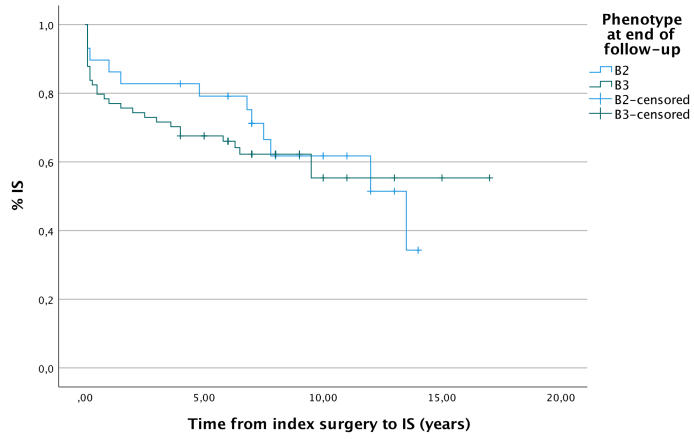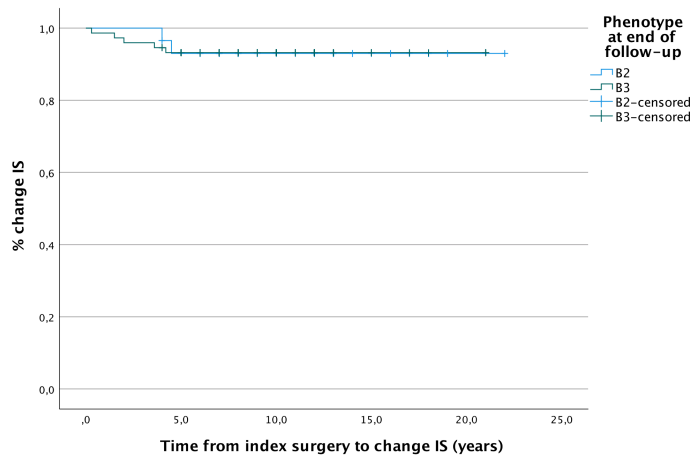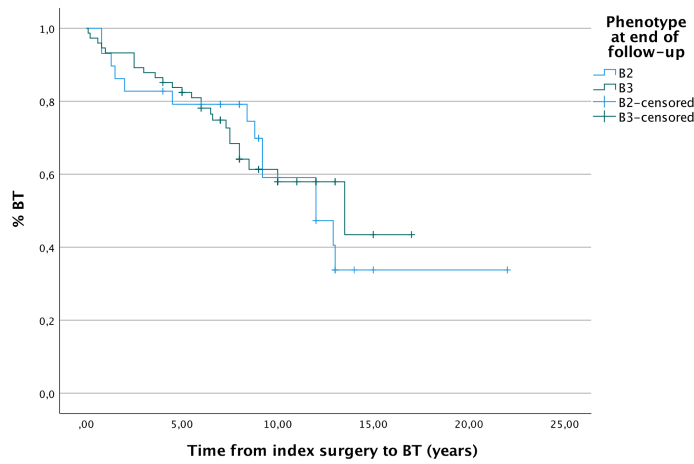

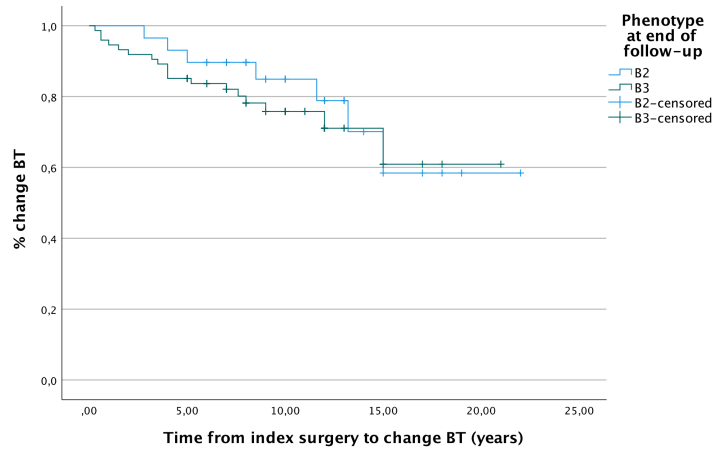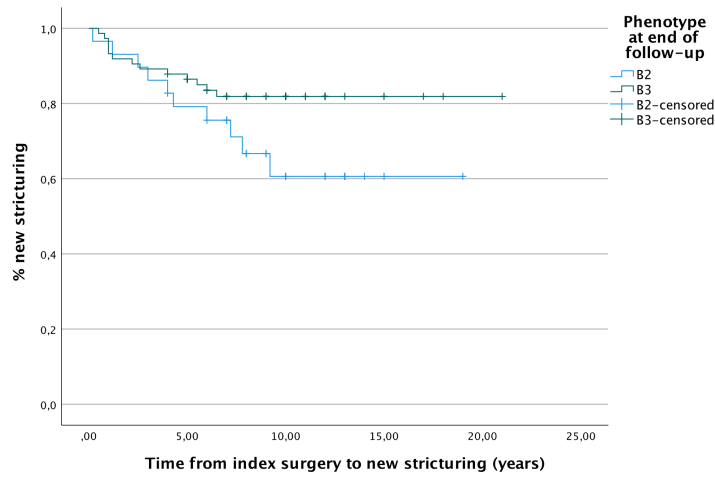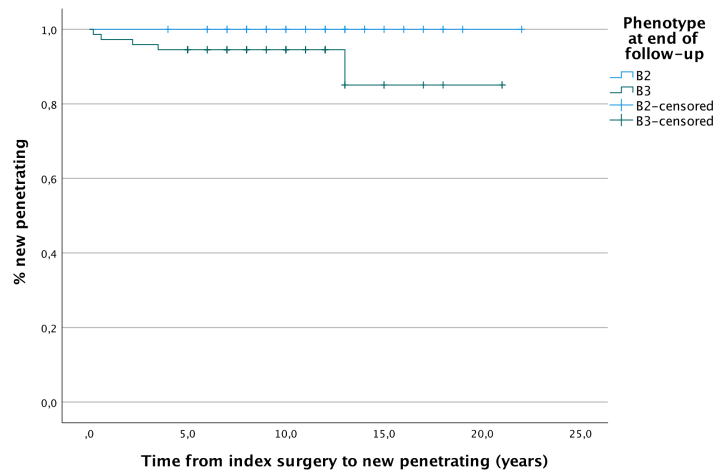

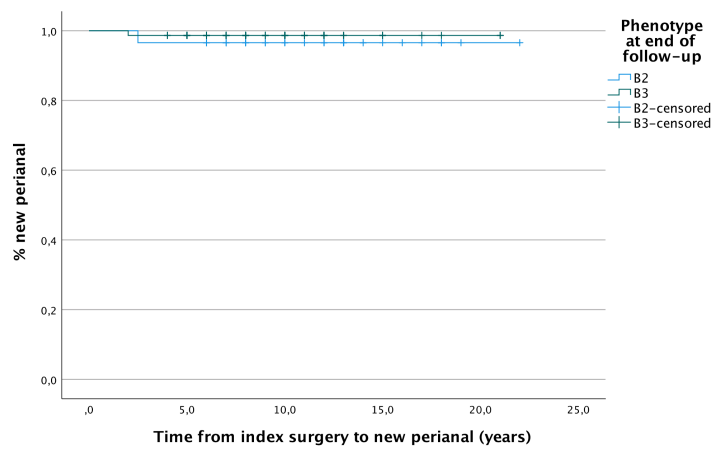

Supplement: ct9-12-e00330-s003.pdf [file ct9-12-e00330-s003.pdf]
