# Supplementary material for: Ileal Crohn's Disease Exhibits Similar Transmural Fibrosis Irrespective of Phenotype
Source: PubMed Central journal article supplement — Clin Transl Gastroenterol. 2021 Apr 13;12(4):e00330. doi: 10.14309/ctg.0000000000000330 (PMC8049162; doi:10.14309/ctg.0000000000000330), 2021-04-13

Graphical representation of histopathological scoring per section and CD phenotype: stricturing (B2) vs penetrating without associated stricture (B3o) vs penetrating with associated stricture (B3s). Caption: A – Inflammation scores; B – Fibrosis scores.

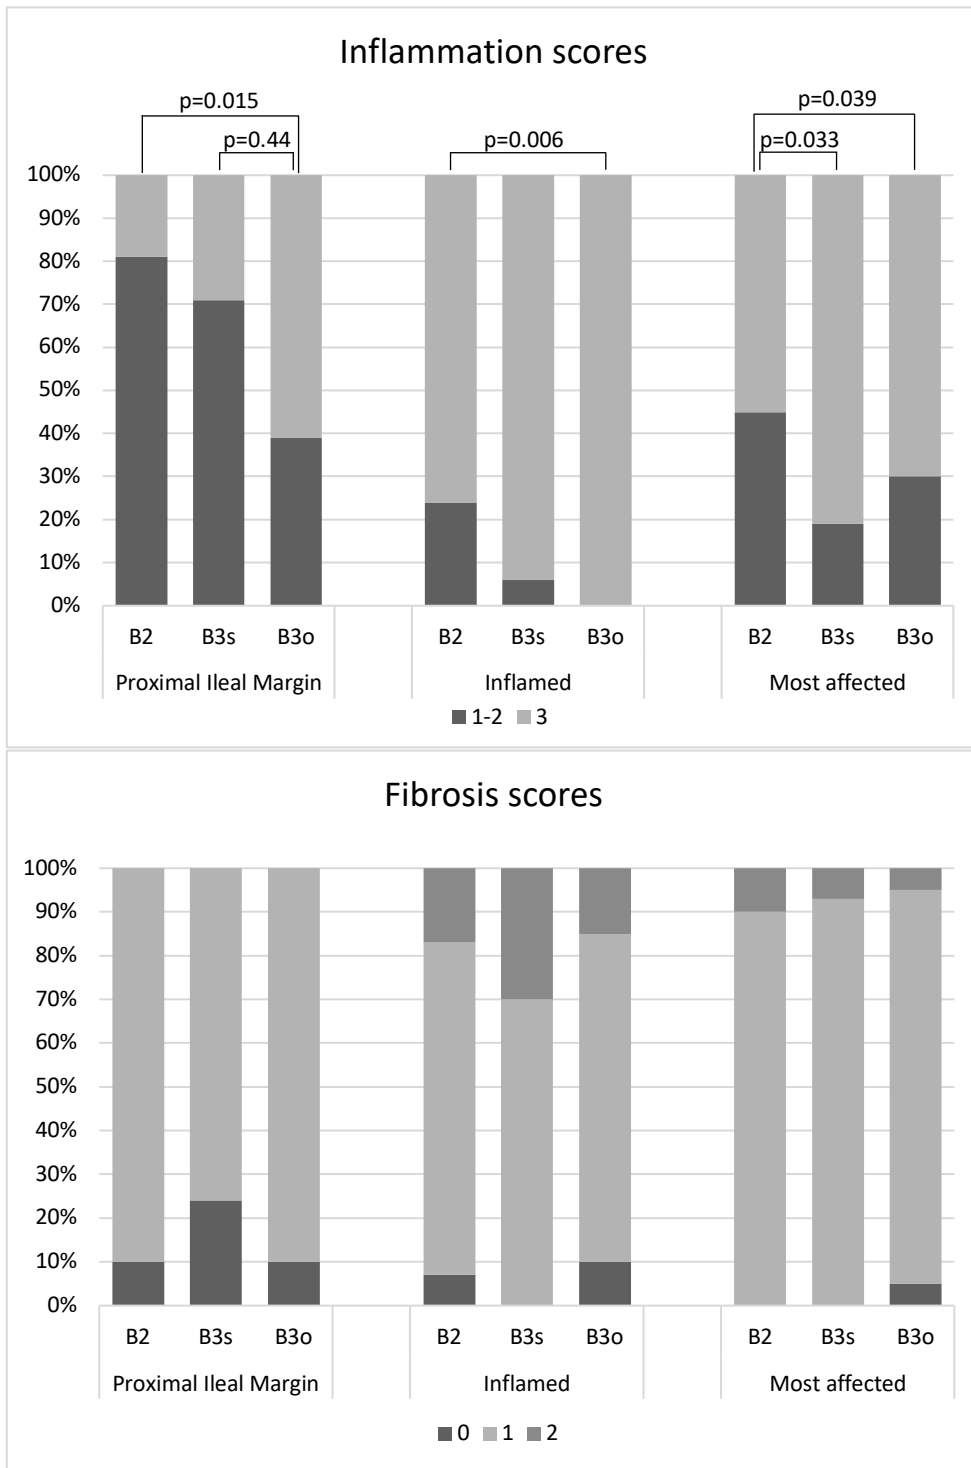

Supplement: ct9-12-e00330-s004.pdf [file ct9-12-e00330-s004.pdf]
